# Supplementary material for: Easy preparation of Cp*-functionalized N-heterocyclic carbenes and their coordination to rhodium and iridium
Source: Royal Society of Chemistry journal article supplement (doi:10.1039/b901195a), 2009-01-01
Supplement: b901195a.pdf [file b901195a.pdf]

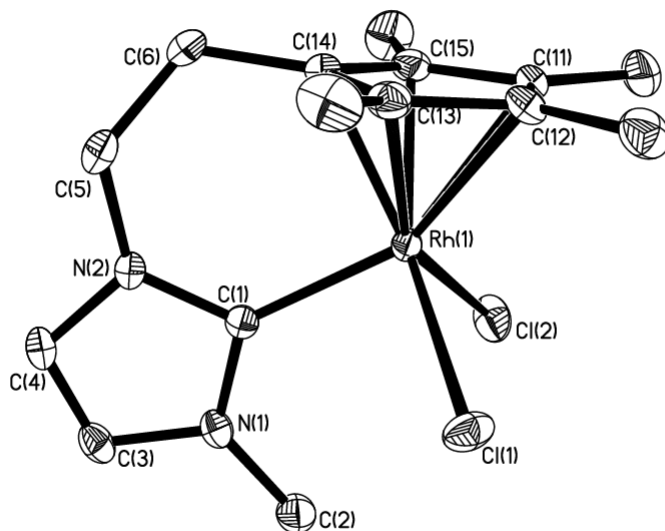

Fig. S1 Ortep diagram of compound **6**, with ellipsoids representing 30% probability. H atoms are omitted for clarity. Selected bond distances (Å) and angles (deg) are: Rh(1)-C(1), 2.033(5); Rh(1)-Cl(1), 2.4294(15); Rh(1)-Cl(2), 2.4467(13); Rh(1)-C(15), 2.127(5); Rh(1)-C(11), 2.244(5); Rh(1)-C(14), 2.106(5); Rh(1)-C(13), 2.119(15); Rh(1)-C(12), 2.233(5), C(1)-Rh(1)-Cl(1), 89.53(14); C(1)-Rh(1)-Cl(2) 95.18(16), Cl(1)-Rh(1)-Cl(2), 94.73(6).
